# Supplementary material for: Bio-sequence stratigraphy of the Neogene: an example from El-Wastani gas field, onshore Nile Delta, Egypt
Source: Copernicus journal article supplement (doi:10.5194/jm-42-147-2023), 2023-10-04
Supplement: Supplementary file 1 [file jm-42-147-2023-supplement.zip]

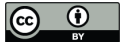

## *Supplement of*

# **Bio-sequence stratigraphy of the Neogene: an example from El-Wastani gas field, onshore Nile Delta, Egypt**

**Ramadan M. El-Kahawy et al.**

*Correspondence to:* Ramadan M. El-Kahawy (relkahawy@sci.cu.edu.eg) and Walid G. Kassab (wkassab@cu.edu.eg)

- jm-42-147-2023-supplement-title-page.pdf
- Supplementary Materials 1.xlsx
- Supplementary Materials 2.xlsx
- Supplementary Materials 3.xlsx

The copyright of individual parts of the supplement might differ from the article licence.
